# Supplementary material
Source: bioRxiv or medRxiv preprint supplement (https://www.biorxiv.org/highwire/filestream/86063/field_highwire_adjunct_files/1/280347-2.pdf)
Supplement: Supplementary file [file 280347-2.pdf]

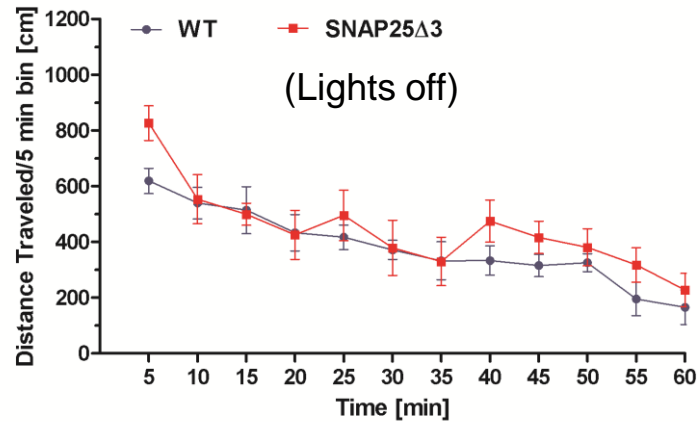

**Total Distance Traveled**

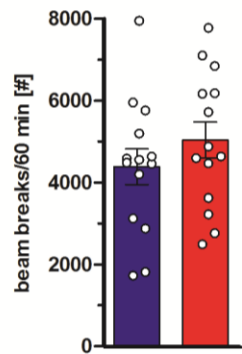

**Rearing**

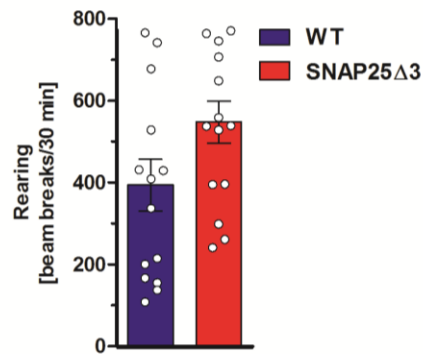

**Supplementary Figure S2.** SNAP25 $\Delta$ 3 homozygotes do not display abnormalities in unstressed motor function.
